# Supplementary material
Source: PubMed Central journal article supplement (PMC3891826)
Supplement: NIHMS491681-supplement-Supplemental.pdf [file NIHMS491681-supplement-Supplemental.pdf]

## Tables

**Table 1. Baseline characteristics (per patient), n=115**

| <b>Characteristic</b>                                                                                                                                                                      | <b>Non-antibiotic-resistant bacterial infection/culture negative</b> | <b>Antibiotic-resistant bacterial infection</b> | <b>p-value</b> |
|--------------------------------------------------------------------------------------------------------------------------------------------------------------------------------------------|----------------------------------------------------------------------|-------------------------------------------------|----------------|
| N                                                                                                                                                                                          | 82                                                                   | 33                                              | -              |
| Male gender                                                                                                                                                                                | 57 (69.5%)                                                           | 21 (63.6%)                                      | 0.66           |
| HCV infection or HCV + ETOH liver disease                                                                                                                                                  | 69 (84.1%)                                                           | 24 (72.7%)                                      | 0.19           |
| Age                                                                                                                                                                                        | 54.4 ± 10.2                                                          | 58.6 ± 10.3                                     | 0.07           |
| Diabetes                                                                                                                                                                                   | 26 (31.7%)                                                           | 13 (39.4%)                                      | 0.52           |
| HIV infection                                                                                                                                                                              | 3 (3.7%)                                                             | 0 (0%)                                          | 0.56           |
| Nosocomial infection                                                                                                                                                                       | 12 (14.6%)                                                           | 22 (66.7%)                                      | 0.001          |
| On beta-blockers                                                                                                                                                                           | 37 (45.1%)                                                           | 17 (51.5%)                                      | 0.54           |
| On proton pump inhibitors                                                                                                                                                                  | 43 (52.4%)                                                           | 24 (72.7%)                                      | 0.06           |
| On lactulose                                                                                                                                                                               | 45 (54.9%)                                                           | 21 (63.6%)                                      | 0.41           |
| Antibiotics within 30 days of bacterial infection (oral non-absorbed or systemic)                                                                                                          | 39 (47.6%)                                                           | 29 (87.9%)                                      | 0.001          |
| Antibiotics within 30 days of bacterial infection <ul style="list-style-type: none"> <li>• No antibiotic</li> <li>• Oral non-absorbed antibiotic</li> <li>• Systemic antibiotic</li> </ul> | 43 (52.4%)<br>25 (30.5%)<br>14 (17.1%)                               | 4 (12.1%)<br>2 (6.1%)<br>27 (81.8%)             | 0.001          |
| Type of bacterial infection <ul style="list-style-type: none"> <li>• Spontaneous infections (SBP, SBE, bacteremia)</li> <li>• UTI</li> <li>• Pneumonia</li> <li>• Other</li> </ul>         | 31 (37.8%)<br>17 (20.7%)<br>20 (24.4%)<br>14 (17.1%)                 | 9 (27.3%)<br>20 (60.6%)<br>2 (6.1%)<br>2 (6.1%) | 0.001          |

|                        |              |             |       |
|------------------------|--------------|-------------|-------|
| White blood cell count | 7.8 ± 5.1    | 9.1 ± 8.9   | 0.83  |
| Platelet count         | 107.4 ± 79.2 | 88.5 ± 52.9 | 0.32  |
| Albumin (g/dL)         | 2.8 ± 0.7    | 3.2 ± 0.8   | 0.01  |
| Bilirubin (mg/dL)      | 6.5 ± 8.5    | 13.2 ± 14.9 | 0.02  |
| INR                    | 1.6 ± 0.5    | 1.8 ± 0.6   | 0.06  |
| Creatinine (mg/dL)     | 1.4 ± 1.0    | 2.4 ± 1.4   | 0.001 |
| Sodium (mEq/L)         | 131.2 ± 15.3 | 135.4 ± 7.1 | 0.06  |
| Child Pugh score       | 9.0 ± 1.5    | 10.1 ± 1.4  | 0.001 |
| MELD score             | 19.5 ± 9.4   | 26.5 ± 9.8  | 0.001 |

**Table 2. Organisms isolated in culture-positive infections (first infection per patient), n=70**

|                                                                                                                        | UTI           | SBP/SBE     | Spontaneous bacteremia | Pneumonia | Other |
|------------------------------------------------------------------------------------------------------------------------|---------------|-------------|------------------------|-----------|-------|
|                                                                                                                        | n=37          | n=13        | n=10                   | n=6       | n=4   |
| <b>Gram negative bacilli</b>                                                                                           |               |             |                        |           |       |
| B-lactam susceptible <i>Escherichia coli</i>                                                                           | 10* (4QR,0CR) | 2 (1QR,0CR) |                        |           |       |
| ESBL producing <i>Escherichia coli</i>                                                                                 | 2 (2QR,2CR)   | 1 (1QR,1CR) |                        |           |       |
| B-lactam susceptible <i>Klebsiella pneumoniae</i>                                                                      | 6 (2QR,0CR)   | 2 (0QR,0CR) | 1 (0QR,0CR)            | 2         |       |
| ESBL producing <i>Klebsiella pneumoniae</i>                                                                            | 2* (1QR,2CR)  | 1 (1QR,1CR) |                        | 1         | 1     |
| B-lactam susceptible <i>Pseudomonas aeruginosa</i>                                                                     | 1 (0QR,0CR)   |             |                        |           |       |
| ESBL producing <i>Pseudomonas aeruginosa</i>                                                                           | 1 (1QR,1CR)   |             |                        |           |       |
| B-lactam susceptible <i>Citrobacter freundii</i>                                                                       | 1 (0QR,0CR)   | 1 (0QR,0CR) |                        |           |       |
| B-lactam susceptible <i>Enterobacter aerogenes</i>                                                                     |               | 1 (0QR,0CR) |                        |           |       |
| <i>Proteus mirabilis</i>                                                                                               | 1 (0QR,0CR)   |             | 1 (0QR,0CR)            |           |       |
| <i>Haemophilus influenzae</i>                                                                                          |               |             |                        | 1         |       |
| <b>Gram positive cocci</b>                                                                                             |               |             |                        |           |       |
| Vancomycin susceptible <i>Enterococcus</i>                                                                             | 4 (4QR,4CR)   |             | 1 (1QR,1CR)            |           |       |
| Vancomycin resistant <i>Enterococcus</i>                                                                               | 8 (8QR,8CR)   | 2 (2QR,2CR) | 2 (2QR,2CR)            |           |       |
| <i>Streptococcus</i><br>- <i>S. viridans</i> (1), <i>S. mitis</i> (1), $\beta$ -hemolytic Strep (1), Group B Strep (1) |               |             | 3 (3QR,0CR)            |           | 1     |
| Methicillin sensitive <i>Staphylococcus aureus</i>                                                                     |               | 1 (1QR,0CR) | 2 (1QR,0CR)            | 1         | 1     |
| Methicillin resistant <i>Staphylococcus aureus</i>                                                                     | 1 (1QR,1CR)   | 2 (2QR,2CR) |                        | 1         | 1     |

-QR=quinolone resistance ; CR=third-generation cephalosporin resistant

-\*infection with 2 organisms (occurred with 2 UTI's (one was mixed GNeg and GPos); only 1 organism counted on table)

-Other cases consisted of 2 septic arthritis, 1 cellulitis and 1 liver abscess

**Table 3. Specific antibiotic to which patients with culture-positive infections were exposed to in the 30 days prior to the development of infection (n=70 culture-positive episodes in first infection only)**

| <b>Antibiotic</b>                                                                                                                                                                                                                                                               | <b>Number of patients</b>                                                                                                           |
|---------------------------------------------------------------------------------------------------------------------------------------------------------------------------------------------------------------------------------------------------------------------------------|-------------------------------------------------------------------------------------------------------------------------------------|
| No antibiotic                                                                                                                                                                                                                                                                   | 23                                                                                                                                  |
| Oral non-absorbed antibiotics                                                                                                                                                                                                                                                   | 16 (all on rifaximin)                                                                                                               |
| Systemic antibiotics                                                                                                                                                                                                                                                            | 31                                                                                                                                  |
| Oral, fully or partially absorbed antibiotics used for SBP prophylaxis (ciprofloxacin, norfloxacin or bactrim)                                                                                                                                                                  | 9                                                                                                                                   |
| Other systemic antibiotics                                                                                                                                                                                                                                                      | 22                                                                                                                                  |
| <ul style="list-style-type: none"> <li>• Piperacillin-tazobactam</li> <li>• 3<sup>rd</sup> generation cephalosporin</li> <li>• Ampicillin/Amoxicillin based</li> <li>• Linezolid or ticarcillin</li> <li>• Levofloxacin</li> <li>• Doxycycline</li> <li>• Vancomycin</li> </ul> | <ul style="list-style-type: none"> <li>• 8</li> <li>• 7</li> <li>• 2</li> <li>• 2</li> <li>• 1</li> <li>• 1</li> <li>• 1</li> </ul> |

**Table 4. Predictors of antibiotic-resistant bacterial infections in 70 culture-positive infections (Of the 115 first infection only patients)**

| <b>UNIVARIATE ANALYSIS for predictors of antibiotic-resistant infection</b>             |                            |                    |
|-----------------------------------------------------------------------------------------|----------------------------|--------------------|
| <b>Characteristic</b>                                                                   | <b>Odds ratio (95% CI)</b> | <b>p value</b>     |
| <b>Demographic variables</b>                                                            |                            |                    |
| Age                                                                                     | 1.02 (0.97– 1.07)          | 0.48               |
| <b>Medications and Co-morbidities</b>                                                   |                            |                    |
| On beta-blockers                                                                        | 1.4 (0.5 – 3.6)            | 0.49               |
| On proton pump inhibitors                                                               | 2.3 (0.8 – 6.2)            | 0.11               |
| Diabetes mellitus                                                                       | 1.2 (0.5 – 3.2)            | 0.71               |
| <b>Mode of infection acquisition and antibiotic exposure history</b>                    |                            |                    |
| Nosocomial infection                                                                    | 10.3 (3.3 – 32.1)          | 0.001              |
| Antibiotics within 30 days of bacterial infection (any antibiotic versus no antibiotic) | 7.7 (2.2 – 26.1)           | 0.001              |
| Antibiotics within 30 days of bacterial infection                                       |                            |                    |
| • No antibiotic                                                                         | 1.0                        | Reference category |
| • Oral non-absorbed antibiotics                                                         | 0.7 (0.1 – 4.2)            | 0.7                |
| • Systemic antibiotics*                                                                 | 32 (7 – 144)               | 0.001              |
| <b>Labs and severity of liver disease</b>                                               |                            |                    |
| Albumin (g/dL)                                                                          | 2.2 (1.0 – 4.6)            | 0.04               |
| White blood cell count                                                                  | 1.03 (0.96 – 1.11)         | 0.44               |
| Child Pugh score                                                                        | 1.8 (1.2 – 2.6)            | 0.002              |
| MELD score                                                                              | 1.08 (1.03 – 1.14)         | 0.004              |
| <b>MULTIVARIATE ANALYSIS for predictors of antibiotic-resistant infection</b>           |                            |                    |
| <b>Characteristic</b>                                                                   | <b>Odds ratio (95% CI)</b> | <b>p value</b>     |
| Antibiotic use within 30 days of bacterial infection                                    |                            |                    |
| • No antibiotic                                                                         | • 1                        | • Reference        |
| • Oral non-absorbed antibiotic                                                          | • 0.4 (0.04 – 2.8)         | • 0.32             |
| • Systemic antibiotic*                                                                  | • 13.5 (2.6– 71.6)         | • 0.002            |
| Nosocomial infection                                                                    | 1.6 (0.2 – 9.9)            | 0.6                |
| MELD                                                                                    | 1.05 (0.96 – 1.15)         | 0.3                |
| Albumin (g/dL)                                                                          | 1.5 (0.6 – 4.1)            | 0.4                |

\*\*Some patients also received oral non-absorbed antibiotics

**Table 5. Organisms isolated in culture-positive infections (multiple infections per patient), n=111**

|                                                                                                                                                             | UTI          | SBP/SBE     | Spontaneous bacteremia | Pneumonia | Other |
|-------------------------------------------------------------------------------------------------------------------------------------------------------------|--------------|-------------|------------------------|-----------|-------|
|                                                                                                                                                             | n=52         | n=18        | n=23                   | n=7       | n=11  |
| <b>Gram negative bacilli</b>                                                                                                                                |              |             |                        |           |       |
| B-lactam susceptible <i>Escherichia coli</i>                                                                                                                | 14 (7QR,0CR) | 3 (1QR,0CR) | 2 (2QR,0CR)            |           |       |
| ESBL producing <i>Escherichia coli</i>                                                                                                                      | 2* (2QR,2CR) | 1 (1QR,1CR) |                        |           |       |
| B-lactam susceptible <i>Klebsiella pneumoniae</i>                                                                                                           | 9 (2QR,0CR)  | 2 (0QR,0CR) | 2 (0QR,0CR)            | 2         |       |
| ESBL producing <i>Klebsiella pneumoniae</i>                                                                                                                 | 2* (1QR,2CR) | 1 (1QR,1CR) |                        | 1         | 1     |
| B-lactam susceptible <i>Pseudomonas species</i><br>- <i>P. aeruginosa</i> (2), <i>P. fluorescens</i> (1)                                                    | 2 (0QR,0CR)  |             | 1 (0QR,0CR)            |           |       |
| ESBL producing <i>Pseudomonas aeruginosa</i>                                                                                                                | 1 (1QR,1CR)  |             |                        |           |       |
| B-lactam susceptible <i>Citrobacter freundii</i>                                                                                                            | 1 (0QR,0CR)  | 2 (0QR,0CR) |                        |           |       |
| B-lactam susceptible <i>Enterobacter</i><br><i>E. aerogenes</i> (1), <i>E. cloacae</i> (2)                                                                  | 2 (0QR,0CR)  | 1 (0QR,0CR) |                        |           |       |
| Amp-C-producing <i>Enterobacter cloacae</i>                                                                                                                 | 1 (0QR,1CR)  |             | 1 (1QR,1CR)            |           |       |
| <i>Acinetobacter</i>                                                                                                                                        |              |             | 1 (0QR,0CR)            |           |       |
| <i>Serratia marcescens</i>                                                                                                                                  |              |             |                        |           | 1     |
| <i>Proteus mirabilis</i>                                                                                                                                    | 3 (2QR,0CR)  |             | 1 (0QR,0CR)            |           |       |
| <i>Haemophilus influenzae</i>                                                                                                                               |              |             |                        | 1         |       |
| <b>Gram positive cocci</b>                                                                                                                                  |              |             |                        |           |       |
| Vancomycin susceptible <i>Enterococcus</i>                                                                                                                  | 5* (5QR,5CR) |             | 1 (1QR,1CR)            |           |       |
| Vancomycin resistant <i>Enterococcus</i>                                                                                                                    | 9 (9QR,9CR)  | 3 (3QR,3CR) | 4 (4QR,4CR)            |           |       |
| <i>Streptococcus</i><br>- <i>S. viridans</i> (6), <i>S. mitis</i> (2), <i>S. sanguis</i> (1), $\beta$ -hemolytic <i>Strep</i> (1), Group B <i>Strep</i> (1) |              | 1 (1QR,0CR) | 8 (8QR,0CR)            |           | 2*    |
| Methicillin sensitive <i>Staphylococcus aureus</i>                                                                                                          |              | 2 (2QR,0CR) | 2 (1QR,0CR)            | 1         | 2     |
| Methicillin resistant <i>Staphylococcus aureus</i>                                                                                                          | 1 (1QR,1CR)  | 2 (2QR,2CR) |                        | 2         | 3     |
| Coagulase negative <i>Staphylococcus</i>                                                                                                                    |              |             |                        |           | 2     |

-QR=quinolone resistance ; CR=third-generation cephalosporin resistant

-\*infection with 2 organisms (occurred with 3 UTI's (2 were mixed GNeg and GPos) and 1 cellulitis; only 1 organism counted on table)  
 -Other cases consisted of 3 cellulitis, 3 septic arthritis, 2 endocarditis, 2 line infections and 1 liver abscess

## REFERENCES

1. Tandon P, Garcia-Tsao G. Bacterial infections, sepsis, and multiorgan failure in cirrhosis. *Semin Liver Dis.* 2008;28(1):26-42.
2. Fernandez J, Navasa M, Gomez J, Colmenero J, Vila J, Arroyo V, et al. Bacterial infections in cirrhosis: epidemiological changes with invasive procedures and norfloxacin prophylaxis. *Hepatology.* 2002;35:140-8.
3. Fernandez J, Acevedo J, Castro M, Garcia O, Rodriguez de Lope C, Roca D, et al. Prevalence and risk factors of infections by multiresistant bacteria in cirrhosis: A prospective study. *Hepatology.* 2011. Epub 2011/12/21.
4. Ariza X, Castellote J, Lora-Tamayo J, Girbau A, Salord S, Rota R, et al. Risk factors for resistance to ceftriaxone and its impact on mortality in community, healthcare and nosocomial spontaneous bacterial peritonitis. *J Hepatol.* 2012;56(4):825-32. Epub 2011/12/17.
5. Novovic S, Semb S, Olsen H, Moser C, Knudsen JD, Homann C. First-line treatment with cephalosporins in spontaneous bacterial peritonitis provides poor antibiotic coverage. *Scand J Gastroenterol.* 2012;47(2):212-6. Epub 2011/12/24.
6. Umgelter A, Reindl W, Miedaner M, Schmid RM, Huber W. Failure of current antibiotic first-line regimens and mortality in hospitalized patients with spontaneous bacterial peritonitis. *Infection.* 2009;37(1):2-8. Epub 2009 Jan 23.
7. Baquero F. Antibiotic resistance in Spain: what can be done? Task Force of the General Direction for Health Planning of the Spanish Ministry of Health. *ClinInfectDis.* 1996;23(4):819-23.
8. Turner PJ. Extended-spectrum beta-lactamases. *ClinInfectDis.* 2005;41 Suppl 4:S273-S5.
9. Albrich WC, Monnet DL, Harbarth S. Antibiotic selection pressure and resistance in *Streptococcus pneumoniae* and *Streptococcus pyogenes*. *EmergInfectDis.* 2004;10(3):514-7.
10. Levy SB, O'Brien TF. Global antimicrobial resistance alerts and implications. *ClinInfectDis.* 2005;41 Suppl 4:S219-S20.
11. Levy SB. Antibiotic resistance worldwide--a Spanish task force responds. *ClinInfectDis.* 1996;23(4):824-6.
12. Amin PB, Magnotti LJ, Fischer PE, Fabian TC, Croce MA. Prophylactic antibiotic days as a predictor of sensitivity patterns in acinetobacter pneumonia. *SurgInfect(Larchmt).* 2011;12(1):33-8.
13. Scarpignato C, Pelosini I. Rifaximin, a poorly absorbed antibiotic: pharmacology and clinical potential. *Chemotherapy.* 2005;51 Suppl 1:36-66.

14. Falagas ME, Koletsi PK, Bliziotis IA. The diversity of definitions of multidrug-resistant (MDR) and pandrug-resistant (PDR) *Acinetobacter baumannii* and *Pseudomonas aeruginosa*. *J Med Microbiol*. 2006;55(Pt 12):1619-29. Epub 2006/11/17.
15. Horan TC, Andrus M, Dudeck MA. CDC/NHSN surveillance definition of health care-associated infection and criteria for specific types of infections in the acute care setting. *AmJInfectControl*. 2008;36(5):309-32.
16. Gustot T, Durand F, Lebrec D, Vincent JL, Moreau R. Severe sepsis in cirrhosis. *Hepatology*. 2009;50(6):2022-33.
17. Arvaniti V, D'Amico G, Fede G, Manousou P, Tsochatzis E, Pleguezuelo M, et al. Infections in patients with cirrhosis increase mortality four-fold and should be used in determining prognosis. *Gastroenterology*. 2010;139(4):1246-56, 56.
18. Siegel JD, Rhinehart E, Jackson M, Chiarello L. Management of multidrug-resistant organisms in health care settings, 2006. *AmJInfectControl*. 2007;35(10 Suppl 2):S165-S93.
19. Angeloni S, Leboffe C, Parente A, Venditti M, Giordano A, Merli M, et al. Efficacy of current guidelines for the treatment of spontaneous bacterial peritonitis in the clinical practice. *World J Gastroenterol*. 2008;14(17):2757-62.
20. Park YH, Lee HC, Song HG, Jung S, Ryu SH, Shin JW, et al. Recent increase in antibiotic-resistant microorganisms in patients with spontaneous bacterial peritonitis adversely affects the clinical outcome in Korea. *JGastroenterolHepatol*. 2003;18(8):927-33.
21. Cheong HS, Kang CI, Lee JA, Moon SY, Joung MK, Chung DR, et al. Clinical significance and outcome of nosocomial acquisition of spontaneous bacterial peritonitis in patients with liver cirrhosis. *ClinInfectDis*. 2009;48(9):1230-6.
22. Singh N, Wagener MM, Gayowski T. Changing epidemiology and predictors of mortality in patients with spontaneous bacterial peritonitis at a liver transplant unit. *Clin Microbiol Infect*. 2003;9(6):531-7.
23. Merli M, Lucidi C, Giannelli V, Giusto M, Riggio O, Falcone M, et al. Cirrhotic patients are at risk for health care-associated bacterial infections. *ClinGastroenterolHepatol*. 2010;8(11):979-85.
24. Acevedo J, Fernandez J, Castro M, Garcia O, Rodriguez-de-Lopez C, Navasa M, et al. Current efficacy of recommended empirical antibiotic therapy in patients with cirrhosis and bacterial infection. *J Hepatol*. 2009:(abstract).
25. Drinka P, Niederman MS, El-Solh AA, Crnich CJ. Assessment of Risk Factors for Multi-Drug Resistant Organisms to Guide Empiric Antibiotic Selection in Long Term Care: A Dilemma. *JAmMedDirAssoc*. 2010.
26. Chon YE, Kim SU, Lee CK, Park JY, Kim DY, Han KH, et al. Community-Acquired Versus Nosocomial Spontaneous Bacterial Peritonitis in Patients with Liver Cirrhosis. *JHepatol*. 2011;54(Suppl 1):S379-S.
27. Safdar N, Maki DG. The commonality of risk factors for nosocomial colonization and infection with antimicrobial-resistant *Staphylococcus aureus*, enterococcus, gram-negative bacilli, *Clostridium difficile*, and *Candida*. *AnnInternMed*. 2002;136(11):834-44.



28. Shorr AF, Zilberberg MD, Micek ST, Kollef MH. Prediction of infection due to antibiotic-resistant bacteria by select risk factors for health care-associated pneumonia. *ArchInternMed*. 2008;168(20):2205-10.
29. Wright GD. Q&A: Antibiotic resistance: where does it come from and what can we do about it? *BMC Biol*. 2010;8:123.
30. Wu UI, Yang CS, Chen WC, Chen YC, Chang SC. Risk factors for bloodstream infections due to extended-spectrum beta-lactamase-producing *Escherichia coli*. *JMicrobiolImmunolInfect*. 2010;43(4):310-6.
31. Caffrey AR, Quilliam BJ, LaPlante KL. Risk factors associated with mupirocin resistance in methicillin-resistant *Staphylococcus aureus*. *JHospInfect*. 2010;76(3):206-10.
32. Yan JJ, Ko WC, Wu JJ, Tsai SH, Chuang CL. Epidemiological investigation of bloodstream infections by extended spectrum cephalosporin-resistant *Escherichia coli* in a Taiwanese teaching hospital. *JClinMicrobiol*. 2004;42(7):3329-32.
33. Du B, Long Y, Liu H, Chen D, Liu D, Xu Y, et al. Extended-spectrum beta-lactamase-producing *Escherichia coli* and *Klebsiella pneumoniae* bloodstream infection: risk factors and clinical outcome. *Intensive Care Med*. 2002;28(12):1718-23.
34. Rodriguez-Bano J, Navarro MD, Romero L, Martinez-Martinez L, Muniain MA, Perea EJ, et al. Epidemiology and clinical features of infections caused by extended-spectrum beta-lactamase-producing *Escherichia coli* in nonhospitalized patients. *JClinMicrobiol*. 2004;42(3):1089-94.
35. Wright GD. Molecular mechanisms of antibiotic resistance. *ChemCommun(Camb)*. 2011;47(14):4055-61.
36. Fraimow HS, Tsigrelis C. Antimicrobial resistance in the intensive care unit: mechanisms, epidemiology, and management of specific resistant pathogens. *Crit Care Clin*. 2011;27(1):163-205.
37. Llovet JM, Rodriguez-Iglesias P, Moitinho E, Planas R, Bataller R, Navasa M, et al. Spontaneous bacterial peritonitis in patients with cirrhosis undergoing selective intestinal decontamination. A retrospective study of 229 spontaneous bacterial peritonitis episodes. *J Hepatol*. 1997;26:88-95.
38. Mas A, Rodes J, Sunyer L, Rodrigo L, Planas R, Vargas V, et al. Comparison of rifaximin and lactitol in the treatment of acute hepatic encephalopathy: results of a randomized, double-blind, double-dummy, controlled clinical trial. *J Hepatol*. 2003;38(1):51-8.
39. Jiang Q, Jiang XH, Zheng MH, Jiang LM, Chen YP, Wang L. Rifaximin versus nonabsorbable disaccharides in the management of hepatic encephalopathy: a meta-analysis. *EurJ Gastroenterol Hepatol*. 2008;20(11):1064-70.
40. Maclayton DO, Eaton-Maxwell A. Rifaximin for treatment of hepatic encephalopathy. *AnnPharmacother*. 2009;43(1):77-84.
41. Adachi JA, DuPont HL. Rifaximin: a novel nonabsorbed rifamycin for gastrointestinal disorders. *ClinInfectDis*. 2006;42(4):541-7.

42. Debbia EA, Maioli E, Roveta S, Marchese A. Effects of rifaximin on bacterial virulence mechanisms at supra- and sub-inhibitory concentrations. *JChemother*. 2008;20(2):186-94.
43. DuPont HL. Biologic properties and clinical uses of rifaximin. *ExpertOpinPharmacother*. 2011;12(2):293-302.
44. DuPont HL, Jiang ZD. Influence of rifaximin treatment on the susceptibility of intestinal Gram-negative flora and enterococci. *ClinMicrobiolInfect*. 2004;10(11):1009-11.
45. Ruiz J, Mensa L, Pons MJ, Vila J, Gascon J. Development of *Escherichia coli* rifaximin-resistant mutants: frequency of selection and stability. *JAntimicrobChemother*. 2008;61(5):1016-9.
46. Concepcion M, Poca M, Gordillo J, Alvarez C, Guarner-Argente C, Casas M, et al. Evolution of Antibiotic Susceptibility of Bacteria Causing Spontaneous Bacterial Peritonitis: A 9-year study. *JHepatol*. 2011;54(Suppl 1):S380-S.
